# Supplementary material for: A high-sensitivity, fast-response and high-stability humidity sensor of curly flake Ti3C2Tx MXene prepared by electrolytic intercalation of NaOH solution
Source: Royal Society of Chemistry journal article supplement (doi:10.1039/d2ta05859f), 2022-01-01
Supplement: d2ta05859f1.pdf [file d2ta05859f1.pdf]

## Electronic Supplementary Information

### **High sensitivity, fast response and high stability humidity sensor of curly flake $\text{Ti}_3\text{C}_2\text{T}_x$ MXene prepared by electrolytic intercalation of NaOH solution**

Junji Chen<sup>a</sup>, ‡ Wenjing Qin<sup>a</sup>, ‡\* Kun Li<sup>b</sup>, Lei Feng<sup>a</sup>, Jianxing Chen<sup>a</sup>, Hanying Qiao<sup>a</sup>, Min Yang<sup>a</sup>, Zhenhao Tian<sup>a</sup>, Xinxin Li<sup>a</sup>, Changshun Gu<sup>a</sup>, Yanli Wang<sup>a</sup>, Zheng Gong<sup>b</sup>, Shougen Yin<sup>a\*</sup>

<sup>a</sup> School of Materials Science and Engineering, Key Laboratory of Display Materials and Photoelectric Devices, Tianjin University of Technology, Tianjin, 300384, China.

<sup>b</sup> School of Integrated Circuit Science and Engineering, Key Laboratory of Power Technology and Intelligent Computing, Tianjin University of Technology, Tianjin, 300384, China.

‡ These authors contributed equally to this work.

\* Corresponding authors E-mail: qinerrr@163.com (W. Q); sgyin@tjut.edu.cn (S. Y)

#### **This file contains:**

Supplementary Figures S1 to S7

Supplementary Table S1

Supplementary Captions for Movies S1 to S2

#### **Other supplementary materials for this manuscript include the following:**

Supplementary Movies S1 to S2

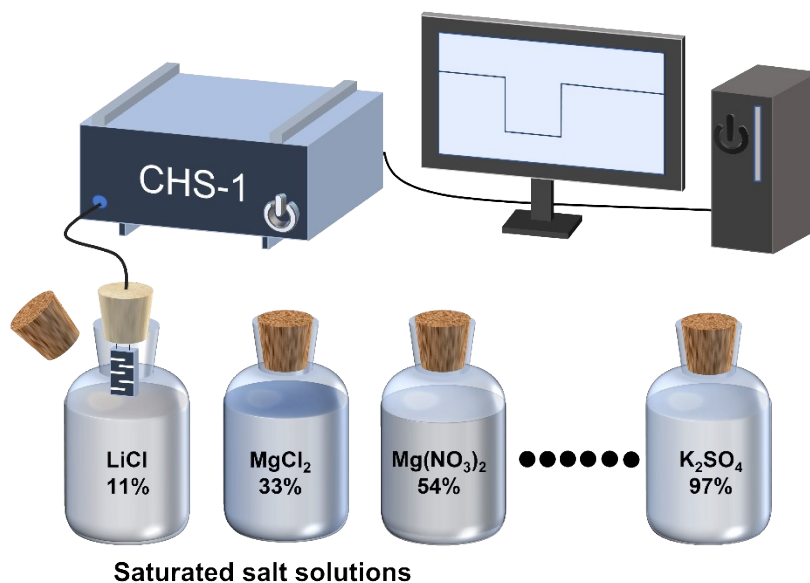

**Figure S1.** Schematic diagram of the experimental setup.

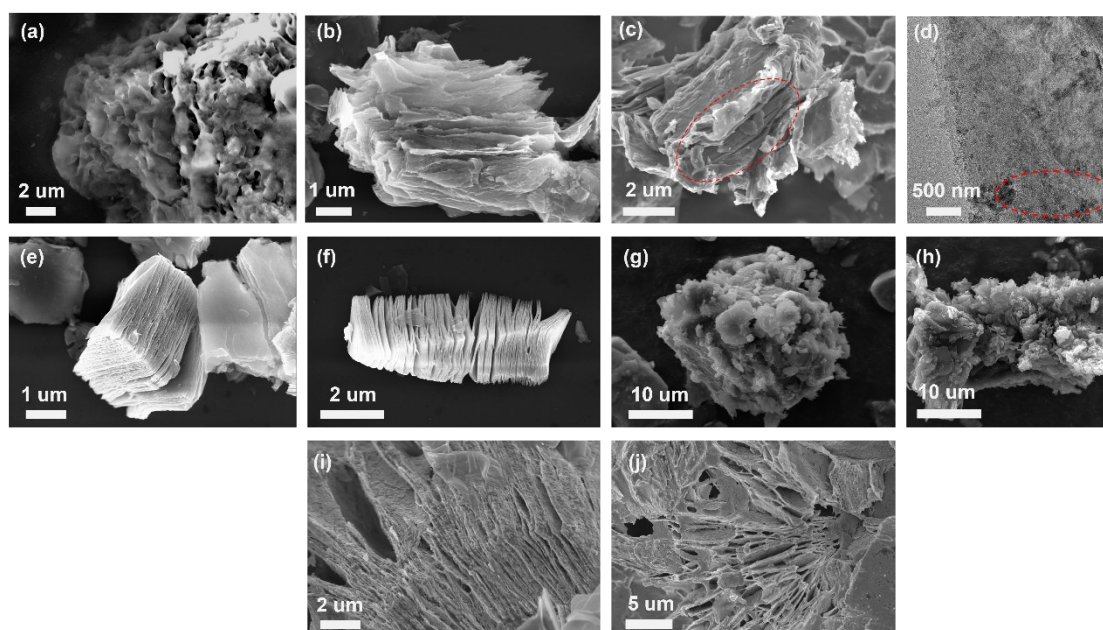

**Figure S2.** (a) SEM images of CF-Ti<sub>3</sub>C<sub>2</sub>T<sub>x</sub> MXene; (b, c) SEM images of A1 and A3 samples; (d) TEM images of A3 samples; (e, f) SEM images of B1 samples; (g, h) SEM images of B2 samples; (i, j) SEM images of B3 samples.

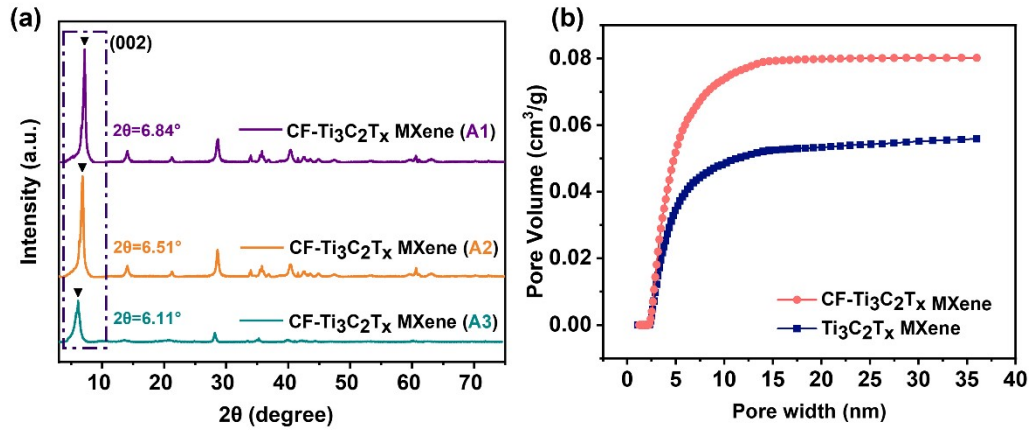

**Figure S3.** (a) XRD patterns of A1、A2 and A3 samples; (b) Pore size distribution curves of Ti<sub>3</sub>C<sub>2</sub>T<sub>x</sub> MXene and CF-Ti<sub>3</sub>C<sub>2</sub>T<sub>x</sub> MXene.

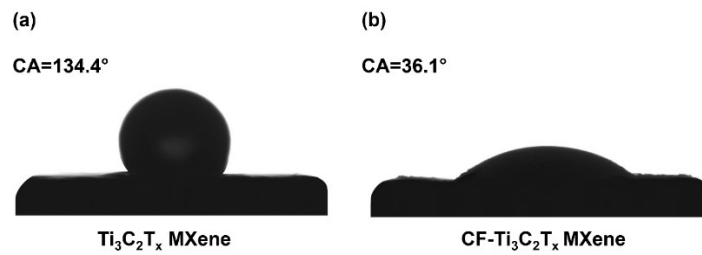

**Figure S4.** Hydrophilic angle test of (a) Ti<sub>3</sub>C<sub>2</sub>T<sub>x</sub> MXene and (b) CF-Ti<sub>3</sub>C<sub>2</sub>T<sub>x</sub> MXene.

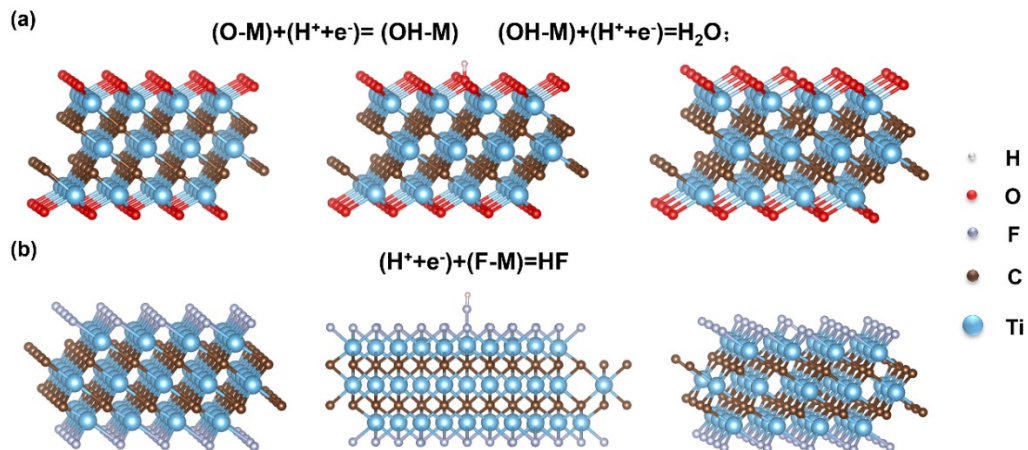

**Figure S5.** (a) Schematic diagram of the hydro-deoxygenation model; (b) Schematic diagram of the hydro-defluorination model.

**Table S1.** Bader charges of the two adsorption processes.

| Bader charge         |                           |           |                           |
|----------------------|---------------------------|-----------|---------------------------|
|                      | Gain or Loss of Electrons |           | Gain or Loss of Electrons |
| <b>H</b>             | -0.2589                   | <b>OH</b> | 0.6302                    |
| <b>O termination</b> | 0.8891                    |           |                           |
| <b>H</b>             | -0.429                    | <b>HF</b> | 0.3362                    |
| <b>F termination</b> | 0.7652                    |           |                           |

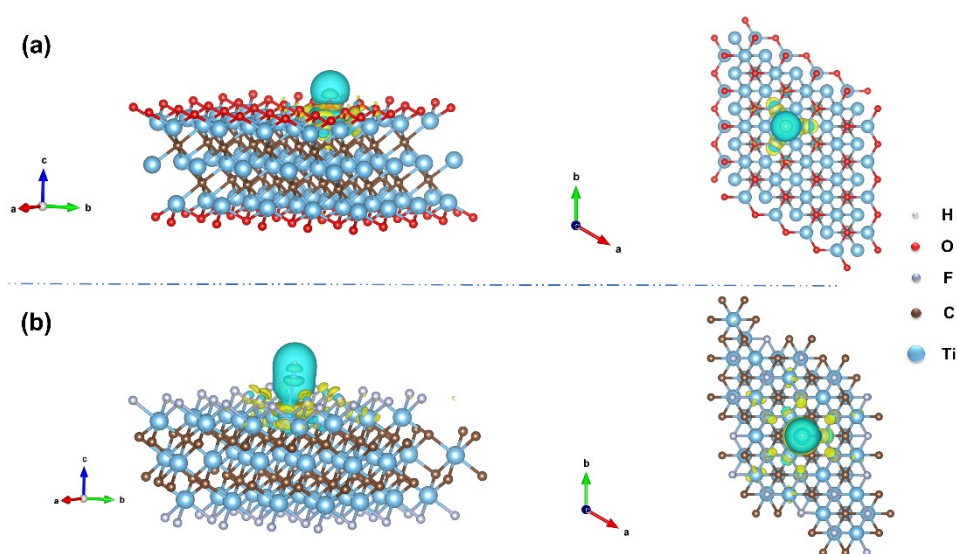

**Figure S6.** (a) Differential charge density diagram of the ( $H^+ + e^-$ ) adsorption processes on (a) O termination; (b) F termination.

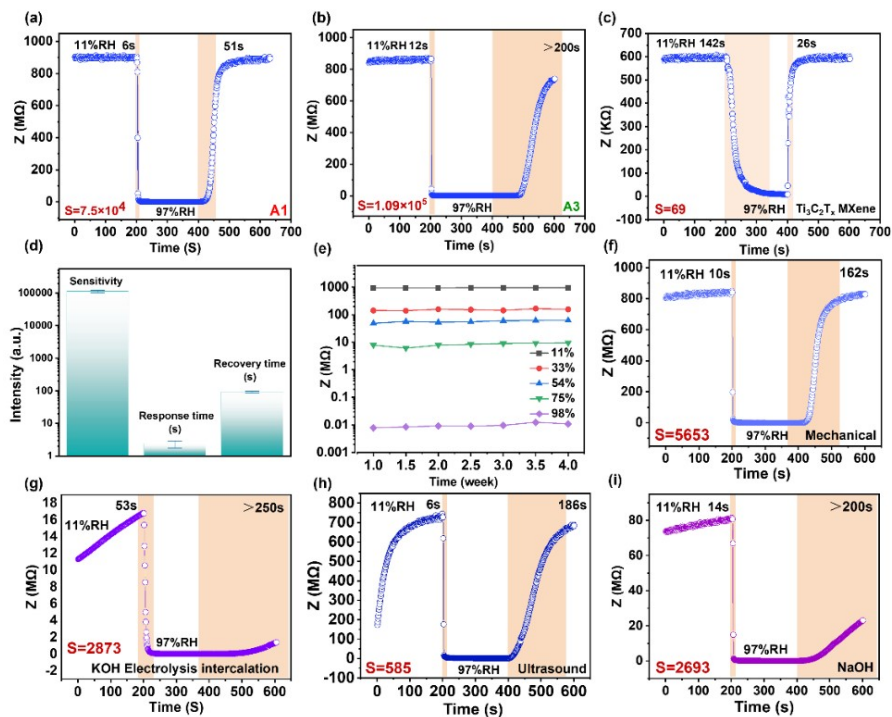

**Figure S7.** (a-c) Humidity response recovery curves of A1, A3 and  $\text{Ti}_3\text{C}_2\text{T}_x$  MXene at 11%RH-97%RH; (d) Batch stability of CF- $\text{Ti}_3\text{C}_2\text{T}_x$  MXene humidity sensor; (e) Storage stability test in the atmosphere. (f-i) Humidity response recovery curves of B1, B2, B3 and B4 for 11%RH-97%RH.

### Movie captions:

**Movie S1.** The working process of non-contact switch. (MP4)

**Movie S2.** The working process of breathing indicator light. (MP4)
